# Supplementary material
Source: publisher figshare collection journal article supplement (https://frontiersin.figshare.com/ndownloader/files/19753238)
Supplement: Supplementary file [file 19753238]

*Supplementary Materials*

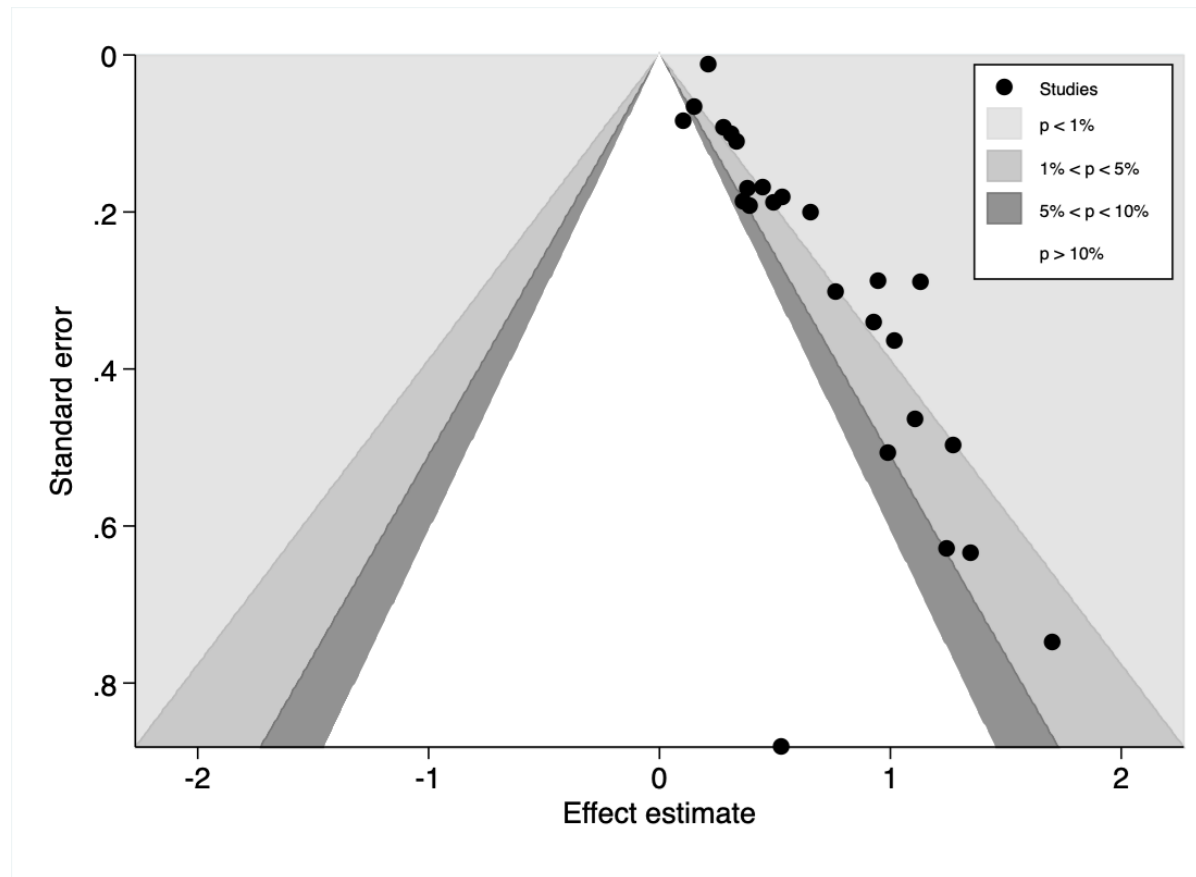

Fig. 1 Publication Bias-Funnel plot for studies evaluating RDW as risk factor. The funnel plot represents the log HR (on the X axis) against its standard error (on the Y axis) for each individual study (represented by one circle). The vertical line represents the combined effect size, with the diagonal lines representing the expected 95% confidence interval for a given standard error.

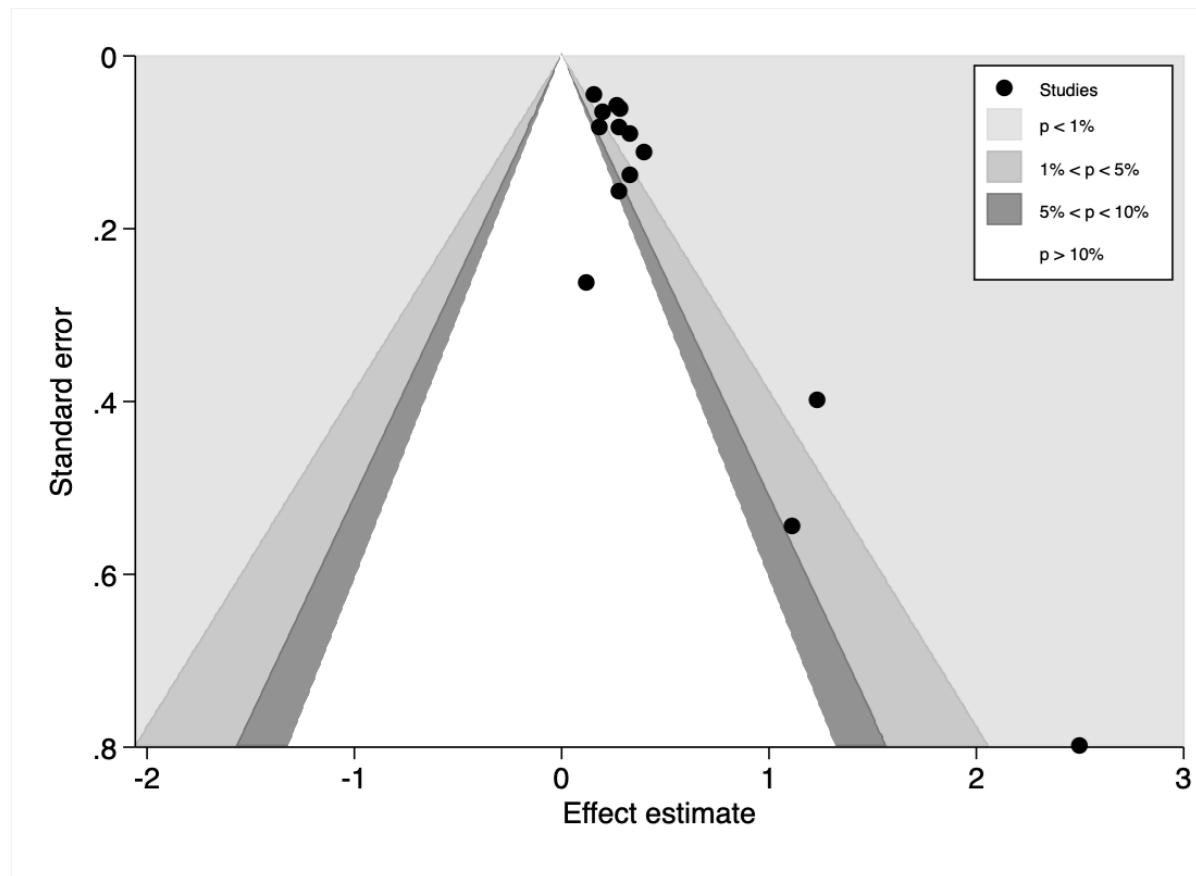

Fig. 2 Publication Bias-Funnel plot for studies evaluating RDW as prognostic factor for mortality. The funnel plot represents the log HR (on the X axis) against its standard error (on the Y axis) for each individual study (represented by one circle). The vertical line represents the combined effect size, with the diagonal lines representing the expected 95% confidence interval for a given standard error.

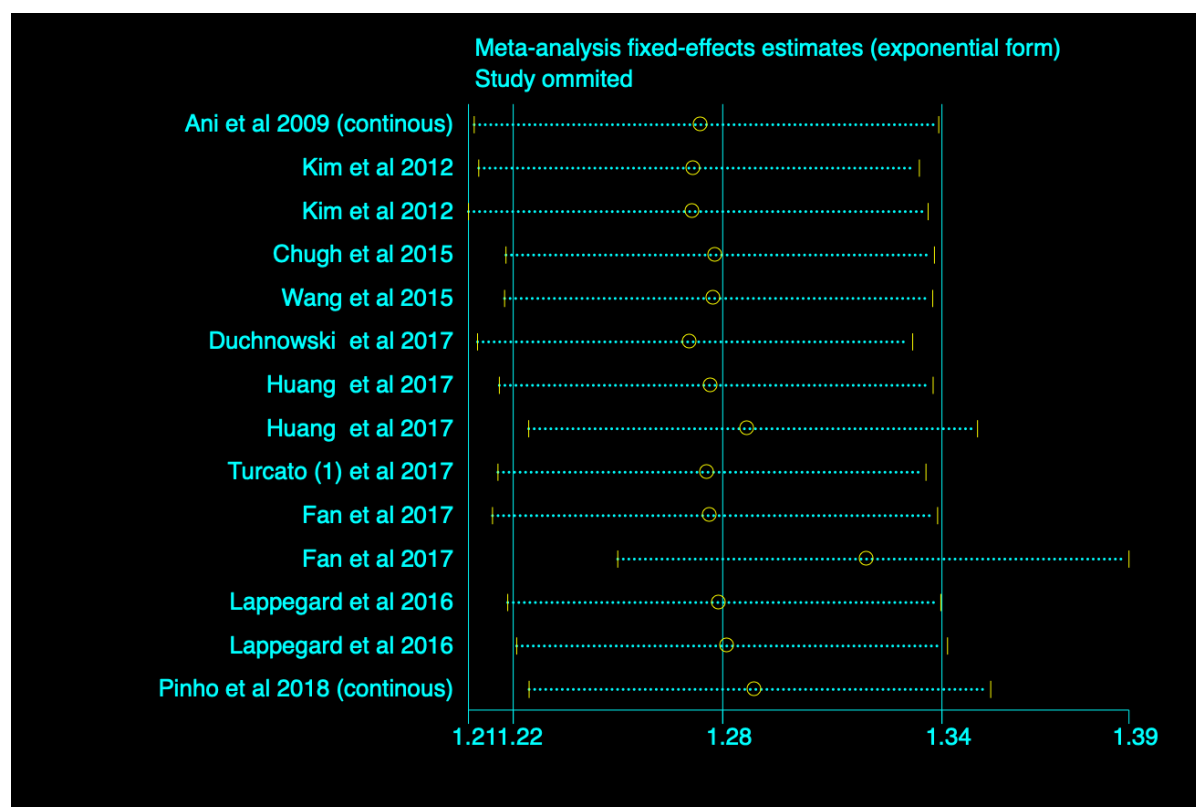

Fig.3 Sensitivity analysis using a “one-study removed” model for studies evaluating RDW as prognostic factor for mortality in stroke.

### Supplementary Table. 1 Search Strategies

Search included: PUBMED, EMBASE: search date was from the inception through April 2018

#### 1) PubMed search strategy

|                                     |
|-------------------------------------|
| 1. "stroke"[Mesh]                   |
| 2. Brain Ischemia [Title/Abstract]  |
| 3. Brain infarction[Title/Abstract] |

|                                                     |
|-----------------------------------------------------|
| 4. cerebral infarction [Title/Abstract]             |
| 5. intracerebral hemorrhage [Title/Abstract]        |
| 6. intracranial hemorrhage [Title/Abstract]         |
| 7. 1 OR 2 OR 3 OR 4 OR 5 OR 6                       |
| 8. "red blood cell distribution width" [MeSH Terms] |
| 9. "RDW"[MeSH Terms]                                |
| 10. "red blood cell distribution width"[All Fields] |
| 11. "RDW"[All Fields]                               |
| 12. 8 OR 9 OR 10 OR 11                              |
| 13. "Survival"[Mesh]                                |
| 14. "Mortality"[Mesh]                               |
| 15. "Prognosis"[Mesh]                               |
| 16. Prognos*[Title/Abstract]                        |
| 17. outcome*[Title/Abstract]                        |
| 18. survival[Title/Abstract]                        |
| 19. mortality[Title/Abstract]                       |
| 20. predict*[Title/Abstract]                        |
| 21. 13 OR 14 OR 15 OR 16 OR 17 OR 18 OR 19 OR 20    |
| 22. 7 AND 12 AND 21                                 |

## 2) Embase search strategy

|                                                              |
|--------------------------------------------------------------|
| 1. 'stroke'/exp                                              |
| 2. Brain Ischemia:ab,ti                                      |
| 3. Brain infarction:ab,ti                                    |
| 4. cerebral infarction:ab,ti                                 |
| 5. intracerebral hemorrhage:ab,ti                            |
| 6. intracranial hemorrhage:ab,ti                             |
| 7. 1 OR 2 OR 3 OR 4 OR 5 OR 6                                |
| 8. red blood cell distribution width'/exp                    |
| 9. red blood cell distribution width                         |
| 10. red blood cell distribution width: ab, ti                |
| 11. RDW: ab, ti                                              |
| 12. 8 OR 9 OR 10 OR 11                                       |
| 13. 'prognosis'/exp                                          |
| 14. 'survival'/exp                                           |
| 15. 'mortality'/exp                                          |
| 16. prognos*: ab, ti                                         |
| 17. outcome*: ab, ti                                         |
| 18. survival: ab, ti                                         |
| 19. treatment: ab, ti                                        |
| 20. mortality': ab, ti                                       |
| 21. recurren*: ab, ti                                        |
| 22. predict*: ab, ti                                         |
| 23. 13 OR 14 OR 15 OR 16 OR 17 OR 18 OR 19 OR 20 OR 21 OR 22 |
| 24. 7 AND 12 AND 23                                          |

**Supplementary Table. 2** Methodological characteristics of included studies and quality score.

| <b>No.</b> | <b>Authors (Ref.) *</b> | <b>Representativeness of population</b> | <b>Non-exposed cohort</b> | <b>Ascertainment of exposure</b> | <b>Outcome present at start of study</b> | <b>Appropriate confounding measurement and account</b> | <b>Sufficient measurement of outcomes</b> | <b>Completeness of follow-up</b> |
|------------|-------------------------|-----------------------------------------|---------------------------|----------------------------------|------------------------------------------|--------------------------------------------------------|-------------------------------------------|----------------------------------|
| 1          | Tonelli et al 2008      | 2                                       | 0                         | 0                                | 2                                        | 2                                                      | 2                                         | 1                                |
| 2          | Ani et al 2009          | 2                                       | 0                         | 0                                | 2                                        | 2                                                      | 2                                         | 1                                |
| 3          | Chen et al 2009         | 1                                       | 0                         | 0                                | 2                                        | 2                                                      | 2                                         | 1                                |
| 4          | Kim et al 2012          | 2                                       | 0                         | 0                                | 2                                        | 2                                                      | 2                                         | 1                                |
| 5          | Malandrino et al 2012   | 1                                       | 0                         | 0                                | 2                                        | 2                                                      | 2                                         | 1                                |
| 6          | Providencia et al 2013  | 2                                       | 0                         | 0                                | 2                                        | 2                                                      | 2                                         | 1                                |
| 7          | Chugh et al 2015        | 2                                       | 0                         | 0                                | 2                                        | 2                                                      | 1                                         | 1                                |
| 8          | Furer et al 2015        | 2                                       | 0                         | 0                                | 2                                        | 2                                                      | 1                                         | 1                                |
| 9          | Lee et al 2015          | 2                                       | 0                         | 0                                | 2                                        | 2                                                      | 2                                         | 1                                |
| 10         | Jia et al 2015          | 2                                       | 0                         | 0                                | 2                                        | 2                                                      | 1                                         | 1                                |
| 11         | Saliba et al 2015       | 1                                       | 0                         | 0                                | 2                                        | 2                                                      | 2                                         | 1                                |
| 12         | Söderholm et al 2015    | 2                                       | 0                         | 0                                | 2                                        | 2                                                      | 2                                         | 1                                |
| 13         | Vaya' et al 2015        | 1                                       | 1                         | 0                                | 2                                        | 2                                                      | 1                                         | 1                                |
| 14         | Wang et al 2015         | 2                                       | 0                         | 0                                | 2                                        | 2                                                      | 2                                         | 1                                |
| 15         | Lappegard et al 2016    | 2                                       | 0                         | 0                                | 2                                        | 2                                                      | 2                                         | 1                                |
| 16         | Miller et al 2016       | 1                                       | 1                         | 0                                | 2                                        | 2                                                      | 1                                         | 1                                |
| 17         | Akboga et al 2017       | 0                                       | 1                         | 0                                | 2                                        | 2                                                      | 0                                         | 1                                |
| 18         | Al-Kindi et al 2017     | 1                                       | 0                         | 0                                | 2                                        | 2                                                      | 2                                         | 1                                |
| 19         | Duchnowski et al 2017   | 2                                       | 0                         | 0                                | 2                                        | 2                                                      | 2                                         | 1                                |
| 20         | Huang et al 2017        | 1                                       | 0                         | 0                                | 2                                        | 2                                                      | 2                                         | 1                                |
| 21         | Fan et al 2017          | 1                                       | 0                         | 0                                | 2                                        | 2                                                      | 0                                         | 1                                |
| 22         | Siegler et al 2017      | 2                                       | 0                         | 0                                | 2                                        | 2                                                      | 2                                         | 1                                |

|    |                           |   |   |   |   |   |   |   |
|----|---------------------------|---|---|---|---|---|---|---|
| 23 | Turcato (1) et al 2017    | 2 | 0 | 0 | 2 | 2 | 2 | 1 |
| 24 | Turcato (2) et al 2017    | 0 | 0 | 0 | 2 | 2 | 1 | 1 |
| 25 | Liang et al 2018          | 2 | 0 | 0 | 2 | 2 | 2 | 1 |
| 26 | Lee et al 2018            | 2 | 0 | 0 | 2 | 2 | 2 | 1 |
| 27 | Mo et al 2017             | 2 | 0 | 0 | 2 | 2 | 2 | 1 |
| 28 | Pilling et al 2018        | 1 | 0 | 0 | 2 | 2 | 2 | 1 |
| 29 | Pinho et al 2018          | 2 | 0 | 0 | 2 | 2 | 2 | 1 |
| 30 | Khongkhatithum et al 2019 | 0 | 1 | 0 | 2 | 2 | 1 | 1 |
| 31 | Tonelli et al 2019        | 0 | 0 | 0 | 2 | 2 | 2 | 1 |

Adequate assessment included 1) representativeness of population: “source population clearly defined” and “study population described” or “study population represents source population or population of interest”; 2) completeness of follow-up: “completeness of follow-up adequate”; 3) non exposed cohort: Drawn from the same community as the exposed cohort; 4) sufficient measurement of outcomes: “outcome measured appropriately”; 5) appropriate confounding measurement and account: “confounders defined and measured” and “confounding accounted for”; and 6) outcome of interest was not present at start of study

\*References as described in manuscript

**Supplementary Table. 3** Sensitivity analysis using a “one-study removed” model for studies evaluating RDW as risk factor of stroke

| Sensitivity analysis         | Heterogeneity test (I <sup>2</sup> ) | Pooled HR (95%CI)    |
|------------------------------|--------------------------------------|----------------------|
| All studies                  | 64.6%                                | 1.544 (1.394, 1.710) |
| Excluding Tonelli et al 2019 | 59.9%                                | 1.641 (1.448, 1.859) |

**Supplementary Table. 4** Publication bias assessment with different tests for mortality and risk factor.

| Publication bias   | Begg's<br><i>P</i> value | Egger's<br><i>P</i> value | T&F(Fill) method analysis |                      | Model  |
|--------------------|--------------------------|---------------------------|---------------------------|----------------------|--------|
|                    |                          |                           | Before                    | After                |        |
| Risk factor subset | 0.002                    | < 0.001                   | 1.544 (1.394, 1.710)      | 1.300 (1.167, 1.447) | random |
| Mortality subset   | 0.021                    | 0.002                     | 1.278 (1.221, 1.337)      | 1.260 (1.206, 1.317) | fixed  |

Abbreviations: CI= confidence interval; Fill=number of studies added by trim and fill method; het= heterogeneity; HR=hazard ratio; T&F=result of trimmed and filled analysis, using assumption of random effects.

**Supplementary Table. 5** Confounding variables in multivariate/univariate regression model in 31 eligible studies included in the meta-analysis.

| No. | Authors (Ref.) *   | Outcome                                 | Outcome source | Confounding variables                    |
|-----|--------------------|-----------------------------------------|----------------|------------------------------------------|
| 1   | Tonelli et al 2008 | Risk of IS                              | MV             | Age, sex, race                           |
| 2   | Ani et al 2009     | Risk of IS                              | UV             |                                          |
|     |                    | Prognosis-mortality                     | MV             | Age, sex, MI, DM, Smoking, WBC, Hct, RDW |
| 3   | Chen et al 2009    | Risk of IS                              | UV             |                                          |
| 4   | Kim et al 2012     | Prognosis-mortality &functional outcome | MV             | Age, sex                                 |



|    |                        |                                          |    |                                                                                                                                                                                   |
|----|------------------------|------------------------------------------|----|-----------------------------------------------------------------------------------------------------------------------------------------------------------------------------------|
| 5  | Malandrino et al 2012  | Risk of IS                               | MV | Age, sex, race, education, smoking, hypertension, BMI, total cholesterol levels, CRP, Hb, MCV, ALB, iron deficiency, vitamin B12 deficiency, folate deficiency, HbA1c, DM         |
| 6  | Providencia et al 2013 | Risk of IS                               | UV |                                                                                                                                                                                   |
| 7  | Chugh et al 2015       | Prognosis-mortality & functional outcome | MV | CBC parameters, CRP, ESR, D-dimer, fibrin, RDW                                                                                                                                    |
| 8  | Furer et al 2015       |                                          |    |                                                                                                                                                                                   |
| 9  | Lee et al 2015         |                                          | MV | Age, sex, hypertension, DM, MI, HF, stroke/TIA, gastrectomy, and malignancy, CHA2DS2-VASc score, Hb, hs-CRP, creatinine clearance.                                                |
| 10 | Jia et al 2015         | risk of carotid artery atherosclerosis   | MV | Smoking, Hypertension, Triglyceride, Serum uric acid, RDW, BUN                                                                                                                    |
| 11 | Saliba et al 2015      | Risk of IS                               | MV | Age, HF, hypertension, DM, previous stroke                                                                                                                                        |
| 12 | Söderholm et al 2015   | Risk of IS                               | MV | Systolic and diastolic blood pressure, blood pressure medication, smoking, DM, alcohol intake, waist circumference, low physical activity, lipid lowering medication, WBC, AF, HF |
|    |                        | Risk of SAH                              | MV |                                                                                                                                                                                   |
|    |                        | Risk of carotid artery atherosclerosis   |    |                                                                                                                                                                                   |
| 13 | Vaya' et al 2015       | risk of Cryptogenic Stroke               | MV | Age, sex, fibrinogen, Leukocytes, Total cholesterol, BMI, Anemia                                                                                                                  |
| 14 | Wang et al 2015        | Prognosis-mortality                      | MV | RDW, NIHSS score                                                                                                                                                                  |
| 15 | Lappegard et al 2016   | Risk of IS                               | MV | Age, sex                                                                                                                                                                          |

|    |                        |                              |     |                                                                                                                                            |
|----|------------------------|------------------------------|-----|--------------------------------------------------------------------------------------------------------------------------------------------|
|    |                        | Prognosis-mortality          | MV  | Age, sex, BMI, smoking, Hb, WBC, PLT, hypertension, cholesterol, triglycerides, DM, RBC, time from baseline measurement to incident stroke |
| 16 | Miller et al 2016      |                              |     |                                                                                                                                            |
| 17 | Akboga et al 2017      | Risk of IS                   | UV? | Hemoglobin, RDW, MPV, PLR, NLR, FPG                                                                                                        |
| 18 | Al-Kindi et al 2017    | Risk of IS                   | MV  | age, gender, race, hemoglobin, SBP, smoking, cholesterol, and insulin use                                                                  |
| 19 | Duchnowski et al 2017  | Risk of IS                   | MV  | Hb, RDW                                                                                                                                    |
|    |                        | Prognosis-mortality          | MV  | Creatinine, RDW                                                                                                                            |
| 20 | Huang et al 2017       | Prognosis-mortality          | MV  | RDW, NLR, simplified acute physiology score                                                                                                |
| 21 | Fan et al 2017         | Prognosis-mortality          | MV  | Age, sex, WBC, eosinophil, monocyte, NIHSS, hypertension, DM, hyperlipidemia, CAD                                                          |
| 22 | Siegler et al 2017     | Prognosis-mortality          | MV  | Age, sex, Hunt–Hess grade, WBC, Hb, Venous thromboembolism, stroke, RDW                                                                    |
| 23 | Turcato (1) et al 2017 | Prognosis-mortality          | UV  |                                                                                                                                            |
| 24 | Turcato (2) et al 2017 | Prognosis-functional outcome | MV  | Age, RDW, NIHSS category, thrombolysis treatment                                                                                           |
| 25 | Liang et al 2018       | Prognosis-functional outcome | MV  | on admission NIHSS score, RDW at baseline, Glucose at baseline                                                                             |
| 26 | Lee et al 2018         | Risk of IS                   | MV  | Age, sex, hypertension, DM, dyslipidemia, smoking, MI, HF, stroke/TIA, CHA2DS2-VASc score, anticoagulants, Hb, RDW                         |
| 27 | Mo et al 2017          | Risk of IS                   | MV  | Charlson Comorbidity Score, ALB, Atrial fibrillation, RDW                                                                                  |
|    |                        | Risk of SAH                  |     | Hypertension, Albumin, RDW                                                                                                                 |

|    |                           |                              |    |                                                                                                                                                                          |
|----|---------------------------|------------------------------|----|--------------------------------------------------------------------------------------------------------------------------------------------------------------------------|
| 28 | Pilling et al 2018        | Risk of IS                   | MV | Age, sex, smoking status, educational attainment, Hb, MCV, RDW                                                                                                           |
| 29 | Pinho et al 2018          | Prognosis-mortality          | MV | Age, sex, race, CBC parameters, early post-stroke clinical status (NIHSS 24 h after thrombolysis, symptomatic intracranial hemorrhage, early post-stroke infection), RDW |
|    |                           | Prognosis-functional outcome | UV |                                                                                                                                                                          |
| 30 | Khongkhatithum et al 2019 | Risk of IS                   | UV |                                                                                                                                                                          |
| 31 | Tonelli et al 2019        | Risk of IS/TIA               | MV | Age, sex, race, morbidities, Hb, WBC, eGFR                                                                                                                               |

DM = Diabetes mellitus, MI = myocardial infarction, CAD=coronary artery disease, HF= heart failure, TIA=transient ischemic stroke  
CRP = C-reactive protein, hs-CRP=high-sensitivity C-reactive protein, BUN = Blood urea nitrogen, Hct = Hematocrit, Hb=Hemoglobin,  
ALB=albumin, eGFR = estimated glomerular filtration rate

**Supplementary Table. 6 PRISMA checklist**

| Section/topic             | #  | Checklist item                                                                                                                                                                                                                                                                                              | Reported on page # |
|---------------------------|----|-------------------------------------------------------------------------------------------------------------------------------------------------------------------------------------------------------------------------------------------------------------------------------------------------------------|--------------------|
| <b>TITLE</b>              |    |                                                                                                                                                                                                                                                                                                             |                    |
| Title                     | 1  | Identify the report as a systematic review, meta-analysis, or both.                                                                                                                                                                                                                                         | Page 1             |
| <b>ABSTRACT</b>           |    |                                                                                                                                                                                                                                                                                                             |                    |
| Structured summary        | 2  | Provide a structured summary including, as applicable: background; objectives; data sources; study eligibility criteria, participants, and interventions; study appraisal and synthesis methods; results; limitations; conclusions and implications of key findings; systematic review registration number. | Page 2             |
| <b>INTRODUCTION</b>       |    |                                                                                                                                                                                                                                                                                                             |                    |
| Rationale                 | 3  | Describe the rationale for the review in the context of what is already known.                                                                                                                                                                                                                              | Page 4             |
| Objectives                | 4  | Provide an explicit statement of questions being addressed with reference to participants, interventions, comparisons, outcomes, and study design (PICOS).                                                                                                                                                  | Page 4             |
| <b>METHODS</b>            |    |                                                                                                                                                                                                                                                                                                             |                    |
| Protocol and registration | 5  | Indicate if a review protocol exists, if and where it can be accessed (e.g., Web address), and, if available, provide registration information including registration number.                                                                                                                               | Page 4             |
| Eligibility criteria      | 6  | Specify study characteristics (e.g., PICOS, length of follow-up) and report characteristics (e.g., years considered, language, publication status) used as criteria for eligibility, giving rationale.                                                                                                      | Page 5             |
| Information sources       | 7  | Describe all information sources (e.g., databases with dates of coverage, contact with study authors to identify additional studies) in the search and date last searched.                                                                                                                                  | Page 5, 6          |
| Search                    | 8  | Present full electronic search strategy for at least one database, including any limits used, such that it could be repeated.                                                                                                                                                                               | Page 4             |
| Study selection           | 9  | State the process for selecting studies (i.e., screening, eligibility, included in systematic review, and, if applicable, included in the meta-analysis).                                                                                                                                                   | Page 5             |
| Data collection process   | 10 | Describe method of data extraction from reports (e.g., piloted forms, independently, in duplicate) and any processes for obtaining and confirming data from investigators.                                                                                                                                  | Page 5             |

|                                    |    |                                                                                                                                                                                                                        |        |
|------------------------------------|----|------------------------------------------------------------------------------------------------------------------------------------------------------------------------------------------------------------------------|--------|
| Data items                         | 11 | List and define all variables for which data were sought (e.g., PICOS, funding sources) and any assumptions and simplifications made.                                                                                  | Page 5 |
| Risk of bias in individual studies | 12 | Describe methods used for assessing risk of bias of individual studies (including specification of whether this was done at the study or outcome level), and how this information is to be used in any data synthesis. | Page 6 |
| Summary measures                   | 13 | State the principal summary measures (e.g., risk ratio, difference in means).                                                                                                                                          | Page 6 |
| Synthesis of results               | 14 | Describe the methods of handling data and combining results of studies, if done, including measures of consistency (e.g., $I^2$ ) for each meta-analysis.                                                              | Page 6 |

Page 1 of 2

| Section/topic                 | #  | Checklist item                                                                                                                                                                                           | Reported on page # |
|-------------------------------|----|----------------------------------------------------------------------------------------------------------------------------------------------------------------------------------------------------------|--------------------|
| Risk of bias across studies   | 15 | Specify any assessment of risk of bias that may affect the cumulative evidence (e.g., publication bias, selective reporting within studies).                                                             | Page 6             |
| Additional analyses           | 16 | Describe methods of additional analyses (e.g., sensitivity or subgroup analyses, meta-regression), if done, indicating which were pre-specified.                                                         | Page 6             |
| <b>RESULTS</b>                |    |                                                                                                                                                                                                          |                    |
| Study selection               | 17 | Give numbers of studies screened, assessed for eligibility, and included in the review, with reasons for exclusions at each stage, ideally with a flow diagram.                                          | Page 7             |
| Study characteristics         | 18 | For each study, present characteristics for which data were extracted (e.g., study size, PICOS, follow-up period) and provide the citations.                                                             | Page 7             |
| Risk of bias within studies   | 19 | Present data on risk of bias of each study and, if available, any outcome level assessment (see item 12).                                                                                                | Page 7             |
| Results of individual studies | 20 | For all outcomes considered (benefits or harms), present, for each study: (a) simple summary data for each intervention group (b) effect estimates and confidence intervals, ideally with a forest plot. | Page 7-10          |
| Synthesis of results          | 21 | Present results of each meta-analysis done, including confidence intervals and measures of consistency.                                                                                                  | Page 7-10          |
| Risk of bias across studies   | 22 | Present results of any assessment of risk of bias across studies (see Item 15).                                                                                                                          | Page 10            |
| Additional analysis           | 23 | Give results of additional analyses, if done (e.g., sensitivity or subgroup analyses, meta-regression [see Item 16]).                                                                                    | Page 9, 10         |

| <b>DISCUSSION</b>   |    |                                                                                                                                                                                      |         |
|---------------------|----|--------------------------------------------------------------------------------------------------------------------------------------------------------------------------------------|---------|
| Summary of evidence | 24 | Summarize the main findings including the strength of evidence for each main outcome; consider their relevance to key groups (e.g., healthcare providers, users, and policy makers). | Page 10 |
| Limitations         | 25 | Discuss limitations at study and outcome level (e.g., risk of bias), and at review-level (e.g., incomplete retrieval of identified research, reporting bias).                        | Page 13 |
| Conclusions         | 26 | Provide a general interpretation of the results in the context of other evidence, and implications for future research.                                                              | Page 13 |
| <b>FUNDING</b>      |    |                                                                                                                                                                                      |         |
| Funding             | 27 | Describe sources of funding for the systematic review and other support (e.g., supply of data); role of funders for the systematic review.                                           | Page 13 |

*From:* Moher D, Liberati A, Tetzlaff J, Altman DG, The PRISMA Group (2009). Preferred Reporting Items for Systematic Reviews and Meta-Analyses: The PRISMA Statement. PLoS Med 6(6): e1000097. doi:10.1371/journal.pmed1000097

For more information, visit: [www.prisma-statement.org](http://www.prisma-statement.org).
